# Supplementary material
Source: Elsevier journal article supplement (https://www.sciencedirect.com/science/article/pii/S2444866417300508)
Supplement: mmc1 [file S2444866417300508:mmc1.xlsx]

## Sheet: Description
Label	Description
Proteins ID	All proteins identifed in at least 2 individuals
Quantification	Protein emPAI ratio P/T for common proteins in at least 2 individulas per group
Qualitative	Unique proteins in at least 2 individuals per group

## Sheet: Proteins ID
Protein Accesion	Mascot Score	Protein MW	Nº Peptides	Protein Name
ALBU_HUMAN	4517	69321	139	Serum albumin
AMBP_HUMAN	2796	38974	56	Protein AMBP
K2C1_HUMAN	2083	65999	35	Keratin, type II cytoskeletal 1
PGBM_HUMAN	1802	468532	71	Basement membrane-specific heparan sulfate proteoglycan core protein
A1AT_HUMAN	1508	46707	39	Alpha-1-antitrypsin
ANGT_HUMAN	1449	53121	25	Angiotensinogen
ZA2G_HUMAN	1449	34237	56	Zinc-alpha-2-glycoprotein
TRFE_HUMAN	1198	77014	45	Serotransferrin
IGHG1_HUMAN	1185	36083	29	Ig gamma-1 chain C region
PTGDS_HUMAN	1044	21015	28	Prostaglandin-H2 D-isomerase
RET4_HUMAN	1036	22995	30	Retinol-binding protein 4
TTHY_HUMAN	878	15877	14	Transthyretin
K1C10_HUMAN	806	58792	30	Keratin, type I cytoskeletal 10
UROM_HUMAN	795	69714	27	Uromodulin
A1AG1_HUMAN	679	23497	14	Alpha-1-acid glycoprotein 1
KNG1_HUMAN	653	71912	21	Kininogen-1
ANT3_HUMAN	636	52569	19	Antithrombin-III
IGKC_HUMAN	530	11602	13	Ig kappa chain C region
IGHG4_HUMAN	523	35918	12	Ig gamma-4 chain C region
CRNN_HUMAN	506	53502	20	Cornulin
LG3BP_HUMAN	498	65289	22	Galectin-3-binding protein
K1C16_HUMAN	495	51236	15	Keratin, type I cytoskeletal 16
GELS_HUMAN	494	85644	13	Gelsolin
VASN_HUMAN	493	71668	10	Vasorin
K2C6A_HUMAN	489	60008	22	Keratin, type II cytoskeletal 6A
AGRIN_HUMAN	481	214706	24	Agrin
CADH1_HUMAN	473	97396	8	Cadherin-1
PEDF_HUMAN	469	46283	12	Pigment epithelium-derived factor
A2GL_HUMAN	447	38154	15	Leucine-rich alpha-2-glycoprotein
ZG16B_HUMAN	445	22725	15	Zymogen granule protein 16 homolog B
LMAN2_HUMAN	442	40203	10	Vesicular integral-membrane protein VIP36
AMPE_HUMAN	436	109176	23	Glutamyl aminopeptidase
CO6A1_HUMAN	424	108462	21	Collagen alpha-1(VI) chain
SCTM1_HUMAN	411	27022	6	Secreted and transmembrane protein 1
ITIH4_HUMAN	405	103293	11	Inter-alpha-trypsin inhibitor heavy chain H4
B2MG_HUMAN	401	13706	17	Beta-2-microglobulin
K22E_HUMAN	399	65393	17	Keratin, type II cytoskeletal 2 epidermal
APOA4_HUMAN	387	45371	33	Apolipoprotein A-IV
ANAG_HUMAN	376	82214	10	Alpha-N-acetylglucosaminidase
ACTB_HUMAN	376	41710	11	Actin, cytoplasmic 1
FBLN3_HUMAN	372	54604	7	EGF-containing fibulin-like extracellular matrix protein 1
CD14_HUMAN	371	40051	11	Monocyte differentiation antigen CD14
FIBA_HUMAN	369	94914	13	Fibrinogen alpha chain
OSTP_HUMAN	353	35401	8	Osteopontin
FETUA_HUMAN	312	39300	11	Alpha-2-HS-glycoprotein
COFA1_HUMAN	308	141632	12	Collagen alpha-1(XV) chain
CYTC_HUMAN	305	15789	7	Cystatin-C
A1AG2_HUMAN	303	23588	10	Alpha-1-acid glycoprotein 2
VTNC_HUMAN	300	54271	10	Vitronectin
MGA_HUMAN	296	209720	12	Maltase-glucoamylase, intestinal
MASP2_HUMAN	295	75654	11	Mannan-binding lectin serine protease 2
K2C5_HUMAN	292	62340	11	Keratin, type II cytoskeletal 5
RS27A_HUMAN	290	17953	15	Ubiquitin-40S ribosomal protein S27a
CYTB_HUMAN	284	11133	9	Cystatin-B
KV302_HUMAN	276	11768	5	Ig kappa chain V-III region SIE
GSTP1_HUMAN	276	23341	8	Glutathione S-transferase P
IGHG2_HUMAN	275	35878	14	Ig gamma-2 chain C region
S10A9_HUMAN	274	13234	5	Protein S100-A9
K1C14_HUMAN	273	51529	13	Keratin, type I cytoskeletal 14
LYAG_HUMAN	268	105257	19	Lysosomal alpha-glucosidase
IGLL5_HUMAN	265	23049	8	Immunoglobulin lambda-like polypeptide 5
LUM_HUMAN	256	38405	7	Lumican
CYTM_HUMAN	255	16500	8	Cystatin-M
FRIL_HUMAN	250	20007	5	Ferritin light chain
COCA1_HUMAN	250	332941	18	Collagen alpha-1(XII) chain
LAC2_HUMAN	244	11287	12	Ig lambda-2 chain C regions
CUBN_HUMAN	242	398480	12	Cubilin
RL40_HUMAN	235	14719	8	Ubiquitin-60S ribosomal protein L40
AACT_HUMAN	230	47621	12	Alpha-1-antichymotrypsin
QPCT_HUMAN	223	40851	6	Glutaminyl-peptide cyclotransferase
IC1_HUMAN	221	55119	8	Plasma protease C1 inhibitor
CD44_HUMAN	211	81487	4	CD44 antigen
CALB1_HUMAN	209	30006	6	Calbindin
CO6A3_HUMAN	206	343457	20	Collagen alpha-3(VI) chain
CSPG4_HUMAN	204	250382	11	Chondroitin sulfate proteoglycan 4
LRP2_HUMAN	203	521616	17	Low-density lipoprotein receptor-related protein 2
K1C9_HUMAN	201	62027	3	Keratin, type I cytoskeletal 9
DLK1_HUMAN	197	41272	10	Protein delta homolog 1
CO8G_HUMAN	194	22264	6	Complement component C8 gamma chain
HV305_HUMAN	187	13218	5	Ig heavy chain V-III region BRO
CERU_HUMAN	185	122128	6	Ceruloplasmin
SH3L3_HUMAN	184	10431	4	SH3 domain-binding glutamic acid-rich-like protein 3
CAD11_HUMAN	184	87911	8	Cadherin-11
K1C17_HUMAN	184	48076	14	Keratin, type I cytoskeletal 17
AMPN_HUMAN	183	109471	15	Aminopeptidase N
GNS_HUMAN	179	62042	6	N-acetylglucosamine-6-sulfatase
H4_HUMAN	177	11360	6	Histone H4
PROF1_HUMAN	176	15045	4	Profilin-1
PIGR_HUMAN	176	83232	5	Polymeric immunoglobulin receptor
HEMO_HUMAN	176	51643	10	Hemopexin
ANXA1_HUMAN	175	38690	6	Annexin A1
EPCR_HUMAN	175	26655	6	Endothelial protein C receptor
S10A8_HUMAN	175	10828	6	Protein S100-A8
SAP3_HUMAN	173	20825	4	Ganglioside GM2 activator
CYTA_HUMAN	167	11000	4	Cystatin-A
6PGL_HUMAN	167	27530	6	6-phosphogluconolactonase
MUC1_HUMAN	166	122029	4	Mucin-1
A1BG_HUMAN	157	54220	5	Alpha-1B-glycoprotein
CD59_HUMAN	155	14168	8	CD59 glycoprotein
UFO_HUMAN	153	98273	9	Tyrosine-protein kinase receptor UFO
NID1_HUMAN	152	136291	9	Nidogen-1
KV301_HUMAN	151	11628	2	Ig kappa chain V-III region B6
FAM3C_HUMAN	150	24665	7	Protein FAM3C
PCOC1_HUMAN	149	47942	6	Procollagen C-endopeptidase enhancer 1
IGSF8_HUMAN	148	64994	5	Immunoglobulin superfamily member 8
THY1_HUMAN	146	17923	4	Thy-1 membrane glycoprotein
CATD_HUMAN	145	44524	8	Cathepsin D
APOA1_HUMAN	143	30759	5	Apolipoprotein A-I
RNAS2_HUMAN	143	18342	5	Non-secretory ribonuclease
SPB3_HUMAN	143	44537	6	Serpin B3
VMO1_HUMAN	141	21520	3	Vitelline membrane outer layer protein 1 homolog
SPRR3_HUMAN	140	18142	6	Small proline-rich protein 3
COL12_HUMAN	139	81465	5	Collectin-12
ADX_HUMAN	136	19381	7	Adrenodoxin, mitochondrial
FINC_HUMAN	134	262460	18	Fibronectin
PRDX2_HUMAN	133	21878	3	Peroxiredoxin-2
DSC2_HUMAN	132	99899	7	Desmocollin-2
FABP5_HUMAN	131	15155	6	Fatty acid-binding protein, epidermal
ILEU_HUMAN	130	42715	5	Leukocyte elastase inhibitor
EZRI_HUMAN	130	69370	7	Ezrin
MOES_HUMAN	126	67778	6	Moesin
KV101_HUMAN	125	11985	3	Ig kappa chain V-I region AG
VTDB_HUMAN	125	52929	6	Vitamin D-binding protein
CFAB_HUMAN	122	85479	5	Complement factor B
CO4A_HUMAN	122	192650	12	Complement C4-A
ROBO4_HUMAN	121	107390	3	Roundabout homolog 4
KV303_HUMAN	119	10722	4	Ig kappa chain V-III region NG9 (Fragment)
PVRL2_HUMAN	119	57706	4	Poliovirus receptor-related protein 2
SODC_HUMAN	118	15926	2	Superoxide dismutase [Cu-Zn]
SH3L1_HUMAN	118	12766	3	SH3 domain-binding glutamic acid-rich-like protein
CAH2_HUMAN	118	29228	4	Carbonic anhydrase 2
DERM_HUMAN	118	23989	5	Dermatopontin
FETA_HUMAN	118	68633	8	Alpha-fetoprotein
THBG_HUMAN	117	46295	3	Thyroxine-binding globulin
CAD13_HUMAN	117	78238	5	Cadherin-13
H2A1B_HUMAN	114	14127	3	Histone H2A type 1-B/E
LAC7_HUMAN	113	11296	6	Ig lambda-7 chain C region
HMCN1_HUMAN	111	613001	23	Hemicentin-1
GPX3_HUMAN	110	25537	4	Glutathione peroxidase 3
IF6_HUMAN	109	26582	2	Eukaryotic translation initiation factor 6
KV312_HUMAN	109	14064	3	Ig kappa chain V-III region HAH
LAMP2_HUMAN	109	44932	5	Lysosome-associated membrane glycoprotein 2
RETN_HUMAN	108	11411	2	Resistin
PGRP2_HUMAN	108	62178	3	N-acetylmuramoyl-L-alanine amidase
GUC2A_HUMAN	105	12380	2	Guanylin
ABHEB_HUMAN	102	22332	3	Alpha/beta hydrolase domain-containing protein 14B
CADM4_HUMAN	100	42759	2	Cell adhesion molecule 4
ALDOA_HUMAN	100	39395	5	Fructose-bisphosphate aldolase A
ATS1_HUMAN	99	105290	2	A disintegrin and metalloproteinase with thrombospondin motifs 1
LYSC_HUMAN	99	16526	3	Lysozyme C
AMYP_HUMAN	99	57670	5	Pancreatic alpha-amylase
CATZ_HUMAN	98	33846	6	Cathepsin Z
CS010_HUMAN	97	18783	3	UPF0556 protein C19orf10
CBPM_HUMAN	96	50481	4	Carboxypeptidase M
NHRF1_HUMAN	94	38845	3	Na(+)/H(+) exchange regulatory cofactor NHE-RF1
IPSP_HUMAN	94	45646	4	Plasma serine protease inhibitor
LAIR1_HUMAN	94	31393	6	Leukocyte-associated immunoglobulin-like receptor 1
KV402_HUMAN	92	12632	5	Ig kappa chain V-IV region Len
FRIH_HUMAN	91	21212	4	Ferritin heavy chain
KV105_HUMAN	90	11654	2	Ig kappa chain V-I region DEE
CLUS_HUMAN	89	52461	3	Clusterin
NGAL_HUMAN	88	22574	5	Neutrophil gelatinase-associated lipocalin
PI16_HUMAN	85	49440	3	Peptidase inhibitor 16
S10AE_HUMAN	84	11655	2	Protein S100-A14
LAMP1_HUMAN	84	44854	6	Lysosome-associated membrane glycoprotein 1
TENA_HUMAN	84	240700	8	Tenascin
ANGL2_HUMAN	84	57068	9	Angiopoietin-related protein 2
DPP2_HUMAN	81	54307	5	Dipeptidyl peptidase 2
PEBP4_HUMAN	80	25717	2	Phosphatidylethanolamine-binding protein 4
PDZ1I_HUMAN	80	12219	3	PDZK1-interacting protein 1
RNAS1_HUMAN	80	17633	3	Ribonuclease pancreatic
PPIA_HUMAN	79	18001	3	Peptidyl-prolyl cis-trans isomerase A
ARSA_HUMAN	78	53554	3	Arylsulfatase A
APOD_HUMAN	78	21262	4	Apolipoprotein D
MXRA8_HUMAN	78	49101	4	Matrix-remodeling-associated protein 8
TNR16_HUMAN	77	45154	3	Tumor necrosis factor receptor superfamily member 16
CO2A1_HUMAN	77	141699	3	Collagen alpha-1(II) chain
CUTA_HUMAN	77	19104	3	Protein CutA
LEG7_HUMAN	76	15066	2	Galectin-7
CATC_HUMAN	76	51820	3	Dipeptidyl peptidase 1
P3IP1_HUMAN	76	28230	3	Phosphoinositide-3-kinase-interacting protein 1
ADIPO_HUMAN	76	26397	4	Adiponectin
TWSG1_HUMAN	73	24999	2	Twisted gastrulation protein homolog 1
H2B1C_HUMAN	73	13898	5	Histone H2B type 1-C/E/F/G/I
S10AB_HUMAN	73	11733	5	Protein S100-A11
COMP_HUMAN	72	82808	3	Cartilage oligomeric matrix protein
DSG2_HUMAN	72	122218	3	Desmoglein-2
LC1L1_HUMAN	71	17907	2	Putative lipocalin 1-like protein 1
SPB4_HUMAN	71	44825	2	Serpin B4
APOH_HUMAN	70	38273	3	Beta-2-glycoprotein 1
DNAS1_HUMAN	70	31414	3	Deoxyribonuclease-1
HBA_HUMAN	69	15248	3	Hemoglobin subunit alpha
ISG15_HUMAN	69	17876	2	Ubiquitin-like protein ISG15
CILP2_HUMAN	69	126211	8	Cartilage intermediate layer protein 2
ANTR1_HUMAN	68	62749	3	Anthrax toxin receptor 1
CEAM8_HUMAN	68	38130	3	Carcinoembryonic antigen-related cell adhesion molecule 8
FBLN5_HUMAN	67	50147	2	Fibulin-5
TPP1_HUMAN	67	61210	3	Tripeptidyl-peptidase 1
PLMN_HUMAN	66	90510	3	Plasminogen
KV401_HUMAN	66	13372	4	Ig kappa chain V-IV region (Fragment)
UTER_HUMAN	65	9987	2	Uteroglobin
CYC_HUMAN	65	11741	3	Cytochrome c
INVO_HUMAN	65	68437	3	Involucrin
GGH_HUMAN	64	35941	2	Gamma-glutamyl hydrolase
CO3_HUMAN	64	187030	9	Complement C3
SDCB1_HUMAN	63	32424	3	Syntenin-1
CMGA_HUMAN	63	50658	2	Chromogranin-A
EFNA1_HUMAN	63	23772	2	Ephrin-A1
GOLM1_HUMAN	62	45306	4	Golgi membrane protein 1
SHSA5_HUMAN	61	25564	3	Protein shisa-5
FABPL_HUMAN	61	14199	2	Fatty acid-binding protein, liver
IBP6_HUMAN	61	25306	2	Insulin-like growth factor-binding protein 6
NID2_HUMAN	61	151158	3	Nidogen-2
BGAL_HUMAN	61	76027	4	Beta-galactosidase
C1RL_HUMAN	61	53464	4	Complement C1r subcomponent-like protein
FLNC_HUMAN	60	290841	3	Filamin-C
CALR_HUMAN	59	48112	2	Calreticulin
KV309_HUMAN	59	12567	3	Ig kappa chain V-III region VG (Fragment)
HSP7C_HUMAN	58	70854	2	Heat shock cognate 71 kDa protein
HSPB1_HUMAN	58	22768	3	Heat shock protein beta-1
CNTN1_HUMAN	58	113249	6	Contactin-1
TPIS_HUMAN	57	30772	4	Triosephosphate isomerase
ANXA2_HUMAN	57	38580	5	Annexin A2
ESAM_HUMAN	56	41151	2	Endothelial cell-selective adhesion molecule
ANXA4_HUMAN	56	35860	3	Annexin A4
BT2A1_HUMAN	55	59594	2	Butyrophilin subfamily 2 member A1
HPT_HUMAN	55	45177	2	Haptoglobin
PGCA_HUMAN	55	250040	7	Aggrecan core protein
FLNA_HUMAN	55	280564	9	Filamin-A
LV403_HUMAN	54	11510	2	Ig lambda chain V-IV region Hil
PGRP1_HUMAN	54	21717	2	Peptidoglycan recognition protein 1
8ODP_HUMAN	54	22505	3	7,8-dihydro-8-oxoguanine triphosphatase
ISLR_HUMAN	53	45968	2	Immunoglobulin superfamily containing leucine-rich repeat protein
SPHM_HUMAN	53	56659	2	N-sulphoglucosamine sulphohydrolase
DSG3_HUMAN	53	107465	2	Desmoglein-3
KV113_HUMAN	53	11827	2	Ig kappa chain V-I region Lay
MFAP5_HUMAN	53	19599	2	Microfibrillar-associated protein 5
CATH_HUMAN	52	37369	2	Pro-cathepsin H
JAM1_HUMAN	52	32562	2	Junctional adhesion molecule A
PGK1_HUMAN	52	44586	2	Phosphoglycerate kinase 1
FHR1_HUMAN	51	37626	2	Complement factor H-related protein 1
PVR_HUMAN	51	45274	2	Poliovirus receptor
COTL1_HUMAN	51	15935	4	Coactosin-like protein
KPYM_HUMAN	51	57900	4	Pyruvate kinase isozymes M1/M2
CO4A2_HUMAN	51	167449	6	Collagen alpha-2(IV) chain
PODXL_HUMAN	50	58599	2	Podocalyxin
FIBG_HUMAN	50	51479	2	Fibrinogen gamma chain
HEG1_HUMAN	50	147369	2	Protein HEG homolog 1
PPGB_HUMAN	49	54431	2	Lysosomal protective protein
EFNB1_HUMAN	49	37982	3	Ephrin-B1
A2MG_HUMAN	49	163188	6	Alpha-2-macroglobulin
PRND_HUMAN	48	20280	2	Prion-like protein doppel
IDH3A_HUMAN	48	39566	2	Isocitrate dehydrogenase [NAD] subunit alpha, mitochondrial
KV308_HUMAN	48	14266	3	Ig kappa chain V-III region CLL
CAH1_HUMAN	47	28852	2	Carbonic anhydrase 1
EPHB4_HUMAN	47	108201	6	Ephrin type-B receptor 4
NCAM1_HUMAN	47	94515	7	Neural cell adhesion molecule 1
1433B_HUMAN	46	28065	2	14-3-3 protein beta/alpha
HEBP2_HUMAN	46	22861	2	Heme-binding protein 2
CD248_HUMAN	46	80807	3	Endosialin
ENDD1_HUMAN	46	54981	3	Endonuclease domain-containing 1 protein
ES8L2_HUMAN	46	80570	3	Epidermal growth factor receptor kinase substrate 8-like protein 2
FABP4_HUMAN	45	14710	2	Fatty acid-binding protein, adipocyte
VCAM1_HUMAN	45	81224	2	Vascular cell adhesion protein 1
CO1A1_HUMAN	45	138857	3	Collagen alpha-1(I) chain
DIAC_HUMAN	45	43732	3	Di-N-acetylchitobiase
THRB_HUMAN	45	69992	7	Prothrombin
TENX_HUMAN	45	464034	12	Tenascin-X
CLM9_HUMAN	44	36037	2	CMRF35-like molecule 9
GUC2B_HUMAN	44	12061	3	Guanylate cyclase activator 2B
PRG2_HUMAN	44	25189	3	Bone marrow proteoglycan
SAP_HUMAN	44	58074	3	Proactivator polypeptide
CD276_HUMAN	44	57199	2	CD276 antigen
CYTT_HUMAN	44	16434	2	Cystatin-SA
FCG3A_HUMAN	44	29071	2	Low affinity immunoglobulin gamma Fc region receptor III-A
NEP_HUMAN	44	85460	2	Neprilysin
ATRN_HUMAN	44	158432	3	Attractin
PPAL_HUMAN	44	48313	3	Lysosomal acid phosphatase
MUC5B_HUMAN	44	595960	10	Mucin-5B
SPRL1_HUMAN	42	75161	3	SPARC-like protein 1
CADH2_HUMAN	41	99747	2	Cadherin-2
ACE2_HUMAN	41	92404	3	Angiotensin-converting enzyme 2
ITIH2_HUMAN	41	106397	3	Inter-alpha-trypsin inhibitor heavy chain H2
EGF_HUMAN	41	133906	4	Pro-epidermal growth factor
FABPH_HUMAN	41	14849	4	Fatty acid-binding protein, heart
COCH_HUMAN	41	59445	6	Cochlin
STA5A_HUMAN	40	90590	2	Signal transducer and activator of transcription 5A
BTD_HUMAN	40	61093	3	Biotinidase
CALL3_HUMAN	40	16880	3	Calmodulin-like protein 3
IL1RA_HUMAN	39	20042	2	Interleukin-1 receptor antagonist protein
IBP1_HUMAN	39	27885	3	Insulin-like growth factor-binding protein 1
H3C_HUMAN	39	15204	4	Histone H3.3C
VSIG4_HUMAN	38	43959	3	V-set and immunoglobulin domain-containing protein 4
LY6D_HUMAN	38	13278	2	Lymphocyte antigen 6D
APOM_HUMAN	38	21239	3	Apolipoprotein M
HEXB_HUMAN	38	63071	3	Beta-hexosaminidase subunit beta
ZN335_HUMAN	38	144802	7	Zinc finger protein 335
AFAM_HUMAN	37	69024	3	Afamin
LOXL4_HUMAN	37	84429	3	Lysyl oxidase homolog 4
DPEP1_HUMAN	36	45645	3	Dipeptidase 1
HV304_HUMAN	36	12348	3	Ig heavy chain V-III region TIL
ACTN4_HUMAN	36	104788	2	Alpha-actinin-4
FIBB_HUMAN	36	55892	2	Fibrinogen beta chain
DPP4_HUMAN	36	88222	3	Dipeptidyl peptidase 4
CSF1_HUMAN	36	60142	4	Macrophage colony-stimulating factor 1
S2544_HUMAN	36	35370	6	Solute carrier family 25 member 44
CDD_HUMAN	35	16174	3	Cytidine deaminase
EF1A1_HUMAN	35	50109	1	Elongation factor 1-alpha 1
NADC_HUMAN	35	30826	2	Nicotinate-nucleotide pyrophosphorylase [carboxylating]
SRC8_HUMAN	35	61549	2	Src substrate cortactin
2B11_HUMAN	35	29895	6	HLA class II histocompatibility antigen, DRB1-1 beta chain
ATAD5_HUMAN	35	207441	6	ATPase family AAA domain-containing protein 5
MA7D1_HUMAN	35	92764	9	MAP7 domain-containing protein 1
HRG_HUMAN	34	59541	2	Histidine-rich glycoprotein
LALBA_HUMAN	34	16214	2	Alpha-lactalbumin
NDUB2_HUMAN	34	12051	2	NADH dehydrogenase [ubiquinone] 1 beta subcomplex subunit 2, mitochondrial
SDC1_HUMAN	34	32442	2	Syndecan-1
DDAH2_HUMAN	34	29625	2	N(G),N(G)-dimethylarginine dimethylaminohydrolase 2
REPS2_HUMAN	34	71489	2	RalBP1-associated Eps domain-containing protein 2
TRPM3_HUMAN	34	197444	4	Transient receptor potential cation channel subfamily M member 3
PPAP_HUMAN	33	44537	2	Prostatic acid phosphatase
TXD17_HUMAN	33	13932	2	Thioredoxin domain-containing protein 17
CATL1_HUMAN	33	37540	2	Cathepsin L1
GLRX1_HUMAN	33	11768	1	Glutaredoxin-1
GPC5C_HUMAN	33	48162	2	G-protein coupled receptor family C group 5 member C
F13B_HUMAN	33	75461	2	Coagulation factor XIII B chain
FBLN2_HUMAN	33	126489	2	Fibulin-2
FL2D_HUMAN	33	44217	2	Pre-mRNA-splicing regulator WTAP
FNIP2_HUMAN	33	122038	2	Folliculin-interacting protein 2
LCN1_HUMAN	33	19238	2	Lipocalin-1
NTF2_HUMAN	33	14469	2	Nuclear transport factor 2
CADH6_HUMAN	33	88254	2	Cadherin-6
GGT3_HUMAN	33	61463	2	Putative gamma-glutamyltranspeptidase 3
KV310_HUMAN	33	12749	2	Ig kappa chain V-III region VH (Fragment)
CDHR2_HUMAN	33	141455	3	Cadherin-related family member 2
SPIT1_HUMAN	33	58360	3	Kunitz-type protease inhibitor 1
CLUL1_HUMAN	33	54180	3	Clusterin-like protein 1
ITIH1_HUMAN	33	101326	3	Inter-alpha-trypsin inhibitor heavy chain H1
DAPK1_HUMAN	33	159945	3	Death-associated protein kinase 1
DCTP1_HUMAN	33	18669	4	dCTP pyrophosphatase 1
PDC6I_HUMAN	33	95963	4	Programmed cell death 6-interacting protein
PANX2_HUMAN	33	74400	5	Pannexin-2
XIRP2_HUMAN	33	382063	5	Xin actin-binding repeat-containing protein 2
ZN668_HUMAN	33	67846	6	Zinc finger protein 668
AKAP9_HUMAN	33	453387	12	A-kinase anchor protein 9
H2A1A_HUMAN	32	14225	2	Histone H2A type 1-A
PRIC4_HUMAN	32	37527	1	Prickle-like protein 4
ANXA5_HUMAN	32	35914	2	Annexin A5
NAPSA_HUMAN	32	45358	2	Napsin-A
PROF2_HUMAN	32	15036	2	Profilin-2
RET2_HUMAN	32	15697	2	Retinol-binding protein 2
CC049_HUMAN	32	33440	2	Putative uncharacterized protein C3orf49
CNTFR_HUMAN	32	40607	2	Ciliary neurotrophic factor receptor subunit alpha
G3P_HUMAN	32	36030	2	Glyceraldehyde-3-phosphate dehydrogenase
RABP2_HUMAN	32	15683	2	Cellular retinoic acid-binding protein 2
RT02_HUMAN	32	33228	2	28S ribosomal protein S2, mitochondrial
FBX30_HUMAN	32	82251	2	F-box only protein 30
REG1A_HUMAN	32	18719	3	Lithostathine-1-alpha
HAVR2_HUMAN	32	33373	3	Hepatitis A virus cellular receptor 2
HDAC4_HUMAN	32	118966	3	Histone deacetylase 4
MTX1_HUMAN	32	51445	3	Metaxin-1
F117A_HUMAN	32	48288	3	Protein FAM117A
BRPF3_HUMAN	32	135660	4	Bromodomain and PHD finger-containing protein 3
PTPRS_HUMAN	32	216905	4	Receptor-type tyrosine-protein phosphatase S
NOD1_HUMAN	32	107622	6	Nucleotide-binding oligomerization domain-containing protein 1
CBPC3_HUMAN	32	115938	7	Cytosolic carboxypeptidase 3
CK5P2_HUMAN	32	214905	7	CDK5 regulatory subunit-associated protein 2
INT7_HUMAN	31	106766	2	Integrator complex subunit 7
MYO5B_HUMAN	31	213538	2	Unconventional myosin-Vb
TSKS_HUMAN	31	65010	2	Testis-specific serine kinase substrate
DNJB2_HUMAN	31	35558	2	DnaJ homolog subfamily B member 2
PECA1_HUMAN	31	82484	2	Platelet endothelial cell adhesion molecule
PRSS8_HUMAN	31	36408	2	Prostasin
S10AG_HUMAN	31	11794	2	Protein S100-A16
CD209_HUMAN	31	45746	2	CD209 antigen
COIA1_HUMAN	31	178077	2	Collagen alpha-1(XVIII) chain
CTGF_HUMAN	31	38065	2	Connective tissue growth factor
LYPD6_HUMAN	31	19105	2	Ly6/PLAUR domain-containing protein 6
NAGAB_HUMAN	31	46534	1	Alpha-N-acetylgalactosaminidase
TSN13_HUMAN	31	22133	1	Tetraspanin-13
SUV3_HUMAN	31	87935	2	ATP-dependent RNA helicase SUPV3L1, mitochondrial
LEG3_HUMAN	31	26136	2	Galectin-3
LITD1_HUMAN	31	98789	2	LINE-1 type transposase domain-containing protein 1
LV301_HUMAN	31	11386	2	Ig lambda chain V-III region SH
MFAP1_HUMAN	31	51927	2	Microfibrillar-associated protein 1
NOVA1_HUMAN	31	52024	2	RNA-binding protein Nova-1
DOP2_HUMAN	31	258068	3	Protein dopey-2
LTBP2_HUMAN	31	194923	5	Latent-transforming growth factor beta-binding protein 2
CNTN2_HUMAN	31	113322	6	Contactin-2
PNKP_HUMAN	31	57041	7	Bifunctional polynucleotide phosphatase/kinase
CA191_HUMAN	31	10988	7	Putative uncharacterized protein C1orf191
ZN217_HUMAN	31	115199	8	Zinc finger protein 217
FLNB_HUMAN	31	277990	9	Filamin-B
COMA1_HUMAN	31	161046	9	Collagen alpha-1(XXII) chain
WDR20_HUMAN	30	62853	2	WD repeat-containing protein 20
CHM1B_HUMAN	30	22095	2	Charged multivesicular body protein 1b
LYVE1_HUMAN	30	35191	2	Lymphatic vessel endothelial hyaluronic acid receptor 1
TETN_HUMAN	30	22522	2	Tetranectin
CPNS1_HUMAN	30	28298	2	Calpain small subunit 1
DNAL4_HUMAN	30	12001	2	Dynein light chain 4, axonemal
EPHB2_HUMAN	30	117417	2	Ephrin type-B receptor 2
K319L_HUMAN	30	115586	2	Dyslexia-associated protein KIAA0319-like protein
SIRBL_HUMAN	30	43332	2	Signal-regulatory protein beta-1 isoform 3
EPHA7_HUMAN	30	112024	2	Ephrin type-A receptor 7
M3K10_HUMAN	30	103630	2	Mitogen-activated protein kinase kinase kinase 10
UK114_HUMAN	30	14485	2	Ribonuclease UK114
MIF_HUMAN	30	12468	2	Macrophage migration inhibitory factor
ZBTB3_HUMAN	30	61789	2	Zinc finger and BTB domain-containing protein 3
C2TA_HUMAN	30	123436	2	MHC class II transactivator
MIME_HUMAN	30	33901	2	Mimecan
BCAM_HUMAN	30	67363	2	Basal cell adhesion molecule
FRMD5_HUMAN	30	65023	2	FERM domain-containing protein 5
ALR_HUMAN	30	23434	2	FAD-linked sulfhydryl oxidase ALR
MYOM3_HUMAN	30	162088	2	Myomesin-3
CALX_HUMAN	30	67526	2	Calnexin
CCAR1_HUMAN	30	132739	2	Cell division cycle and apoptosis regulator protein 1
DEMA_HUMAN	30	45486	2	Dematin
SO5A1_HUMAN	30	91804	3	Solute carrier organic anion transporter family member 5A1
PPM1H_HUMAN	30	56413	3	Protein phosphatase 1H
TMPSC_HUMAN	30	38581	3	Transmembrane protease serine 12
CBG_HUMAN	30	45112	3	Corticosteroid-binding globulin
PLD3_HUMAN	30	54671	3	Phospholipase D3
EXT2_HUMAN	30	82202	3	Exostosin-2
TBB3_HUMAN	30	50400	3	Tubulin beta-3 chain
ZN112_HUMAN	30	105775	4	Zinc finger protein 112
TCRG1_HUMAN	30	123823	5	Transcription elongation regulator 1
GAREM_HUMAN	30	97125	6	GRB2-associated and regulator of MAPK protein
MATN2_HUMAN	30	106767	6	Matrilin-2
ZSC10_HUMAN	30	80336	6	Zinc finger and SCAN domain-containing protein 10
RBCC1_HUMAN	30	182975	7	RB1-inducible coiled-coil protein 1
HORN_HUMAN	30	282228	7	Hornerin
ALPK2_HUMAN	30	236865	8	Alpha-protein kinase 2
SETX_HUMAN	30	302689	12	Probable helicase senataxin
SRRM5_HUMAN	30	80308	17	Serine/arginine repetitive matrix protein 5

## Sheet: Quantification
Gene	Ratio emPAI PreTerm/Term	Log2 (Ratio PreTerm/Term)
CUBN_HUMAN	0.25	-2
GSTP1_HUMAN	0.267442	-1.9027
CALB1_HUMAN	0.36	-1.47393
KV309_HUMAN	0.40708	-1.29662
A1AG1_HUMAN	0.429952	-1.21775
APOD_HUMAN	0.438596	-1.18903
APOH_HUMAN	0.448276	-1.15754
DERM_HUMAN	0.44898	-1.15528
CD44_HUMAN	0.461538	-1.11548
CBPM_HUMAN	0.47619	-1.07039
MUC1_HUMAN	0.5	-1
PIGR_HUMAN	0.5	-1
IGHG2_HUMAN	0.515464	-0.956057
COFA1_HUMAN	0.533333	-0.906891
CATD_HUMAN	0.571429	-0.807355
KV401_HUMAN	0.585034	-0.773408
SAP3_HUMAN	0.59	-0.761213
PGRP1_HUMAN	0.617284	-0.695994
ZG16B_HUMAN	0.623377	-0.681824
SCTM1_HUMAN	0.634921	-0.655352
DIAC_HUMAN	0.648649	-0.624491
FLNA_HUMAN	0.666667	-0.584963
UROM_HUMAN	0.688742	-0.537965
K1C10_HUMAN	0.717949	-0.478047
DLK1_HUMAN	0.764706	-0.387023
VASN_HUMAN	0.775	-0.367732
A2GL_HUMAN	0.797203	-0.326981
K22E_HUMAN	0.819672	-0.286881
UFO_HUMAN	0.842105	-0.247928
LYAG_HUMAN	0.869565	-0.201634
A1AG2_HUMAN	1	0
ADIPO_HUMAN	1	0
AMPE_HUMAN	1	0
ARSA_HUMAN	1	0
ATRN_HUMAN	1	0
CATC_HUMAN	1	0
CD248_HUMAN	1	0
CD59_HUMAN	1	0
CLUS_HUMAN	1	0
COMP_HUMAN	1	0
CYTM_HUMAN	1	0
EFNB1_HUMAN	1	0
EPCR_HUMAN	1	0
FAM3C_HUMAN	1	0
FIBA_HUMAN	1	0
FLNC_HUMAN	1	0
GELS_HUMAN	1	0
GGH_HUMAN	1	0
GNS_HUMAN	1	0
HMCN1_HUMAN	1	0
JAM1_HUMAN	1	0
K2C1_HUMAN	1	0
KV113_HUMAN	1	0
LAIR1_HUMAN	1	0
LAMP2_HUMAN	1	0
PLMN_HUMAN	1	0
PPAP_HUMAN	1	0
PPGB_HUMAN	1	0
PTGDS_HUMAN	1	0
RETN_HUMAN	1	0
S2544_HUMAN	1	0
SH3L1_HUMAN	1	0
SH3L3_HUMAN	1	0
SHSA5_HUMAN	1	0
TNR16_HUMAN	1	0
ZA2G_HUMAN	1.08759	0.121136
COCA1_HUMAN	1.1	0.137504
AMPN_HUMAN	1.11111	0.152003
PGBM_HUMAN	1.15385	0.206451
CD14_HUMAN	1.16981	0.226276
CADH1_HUMAN	1.18519	0.245112
AGRIN_HUMAN	1.2	0.263034
IGHG4_HUMAN	1.21	0.275007
KNG1_HUMAN	1.22	0.286881
LG3BP_HUMAN	1.23214	0.30117
CAD13_HUMAN	1.23529	0.304855
CO6A1_HUMAN	1.26471	0.338802
KV302_HUMAN	1.30919	0.388677
IGLL5_HUMAN	1.33654	0.418501
K1C9_HUMAN	1.36	0.443607
LMAN2_HUMAN	1.39326	0.478463
ITIH4_HUMAN	1.4	0.485427
AMBP_HUMAN	1.40244	0.487938
APOA1_HUMAN	1.408	0.493647
LAC7_HUMAN	1.4542	0.540224
MGA_HUMAN	1.5	0.584963
IGHG1_HUMAN	1.50641	0.591115
FBLN5_HUMAN	1.55	0.632268
VTNC_HUMAN	1.55	0.632268
QPCT_HUMAN	1.59259	0.671377
DSC2_HUMAN	1.6	0.678072
PI16_HUMAN	1.6	0.678072
FBLN3_HUMAN	1.63158	0.706269
SODC_HUMAN	1.68571	0.75336
CS010_HUMAN	1.71642	0.779401
NID1_HUMAN	1.75	0.807355
FINC_HUMAN	1.8	0.847997
UTER_HUMAN	1.80833	0.854661
S10A9_HUMAN	1.82667	0.869213
CYTB_HUMAN	1.93243	0.950418
CYTA_HUMAN	1.94118	0.956931
ALBU_HUMAN	1.94707	0.961307
IGKC_HUMAN	2.04946	1.03524
MASP2_HUMAN	2.07143	1.05063
FETA_HUMAN	2.14286	1.09954
COL12_HUMAN	2.16667	1.11548
PCOC1_HUMAN	2.18182	1.12553
NGAL_HUMAN	2.20833	1.14296
A1BG_HUMAN	2.22222	1.152
CO6A3_HUMAN	2.25	1.16993
LYSC_HUMAN	2.29412	1.19794
COTL1_HUMAN	2.34286	1.22827
CYTC_HUMAN	2.37143	1.24576
GUC2A_HUMAN	2.5	1.32193
TRFE_HUMAN	2.64773	1.40475
TTHY_HUMAN	2.67082	1.41728
LUM_HUMAN	2.98305	1.57679
FETUA_HUMAN	3.03571	1.60204
CAD11_HUMAN	3.16667	1.66297
ANGT_HUMAN	3.46154	1.79141
ANT3_HUMAN	3.7	1.88753
HEMO_HUMAN	3.87097	1.95269
IC1_HUMAN	4.66667	2.22239
RET4_HUMAN	4.84615	2.27684
B2MG_HUMAN	4.96503	2.3118
A1AT_HUMAN	5.38365	2.42858

## Sheet: Qualitative
Preterm
PEDF_HUMAN	Pigment epithelium-derived factor (PEDF) (Cell proliferation-inducing gene 35 protein) (EPC-1) (Serpin F1)
FRIL_HUMAN	Ferritin light chain (Ferritin L subunit)
RL40_HUMAN	Ubiquitin-60S ribosomal protein L40 (CEP52) (Ubiquitin A-52 residue ribosomal protein fusion product 1) [Cleaved into: Ubiquitin; 60S ribosomal protein L40]
PROF1_HUMAN	Profilin-1 (Epididymis tissue protein Li 184a) (Profilin I)
CFAB_HUMAN	Complement factor B (EC 3.4.21.47) (C3/C5 convertase) (Glycine-rich beta glycoprotein) (GBG) (PBF2) (Properdin factor B) [Cleaved into: Complement factor B Ba fragment; Complement factor B Bb fragment]
PEBP4_HUMAN	Phosphatidylethanolamine-binding protein 4 (PEBP-4) (hPEBP4) (Protein cousin-of-RKIP 1)
RNAS1_HUMAN	Ribonuclease pancreatic (EC 3.1.27.5) (HP-RNase) (RIB-1) (RNase UpI-1) (Ribonuclease 1) (RNase 1) (Ribonuclease A) (RNase A)
FRIH_HUMAN	Ferritin heavy chain (Ferritin H subunit) (EC 1.16.3.1) (Cell proliferation-inducing gene 15 protein) [Cleaved into: Ferritin heavy chain, N-terminally processed]
CO3_HUMAN	Complement C3 (C3 and PZP-like alpha-2-macroglobulin domain-containing protein 1) [Cleaved into: Complement C3 beta chain; C3-beta-c (C3bc); Complement C3 alpha chain; C3a anaphylatoxin; Acylation stimulating protein (ASP) (C3adesArg); Complement C3b alpha' chain; Complement C3c alpha' chain fragment 1; Complement C3dg fragment; Complement C3g fragment; Complement C3d fragment; Complement C3f fra…
LAMP1_HUMAN	Lysosome-associated membrane glycoprotein 1 (LAMP-1) (Lysosome-associated membrane protein 1) (CD107 antigen-like family member A) (CD antigen CD107a)
NID2_HUMAN	Nidogen-2 (NID-2) (Osteonidogen)
FABPL_HUMAN	Fatty acid-binding protein, liver (Fatty acid-binding protein 1) (Liver-type fatty acid-binding protein) (L-FABP)
ESAM_HUMAN	Endothelial cell-selective adhesion molecule
MFAP5_HUMAN	Microfibrillar-associated protein 5 (MFAP-5) (MP25) (Microfibril-associated glycoprotein 2) (MAGP-2)
CO4A2_HUMAN	Collagen alpha-2(IV) chain [Cleaved into: Canstatin]
IDH3A_HUMAN	Isocitrate dehydrogenase [NAD] subunit alpha, mitochondrial (EC 1.1.1.41) (Isocitric dehydrogenase subunit alpha) (NAD(+)-specific ICDH subunit alpha)
TENX_HUMAN	Tenascin-X (TN-X) (Hexabrachion-like protein)
CYTT_HUMAN	Cystatin-SA (Cystatin-2) (Cystatin-S5)
THY1_HUMAN	Thy-1 membrane glycoprotein (CDw90) (Thy-1 antigen) (CD antigen CD90)
SAP_HUMAN	Prosaposin (Proactivator polypeptide) [Cleaved into: Saposin-A (Protein A); Saposin-B-Val; Saposin-B (Cerebroside sulfate activator) (CSAct) (Dispersin) (Sphingolipid activator protein 1) (SAP-1) (Sulfatide/GM1 activator); Saposin-C (A1 activator) (Co-beta-glucosidase) (Glucosylceramidase activator) (Sphingolipid activator protein 2) (SAP-2); Saposin-D (Component C) (Protein C)]
VSIG4_HUMAN	V-set and immunoglobulin domain-containing protein 4 (Protein Z39Ig)
SPIT1_HUMAN	Kunitz-type protease inhibitor 1 (Hepatocyte growth factor activator inhibitor type 1) (HAI-1)
FHR1_HUMAN	Complement factor H-related protein 1 (FHR-1) (H factor-like protein 1) (H-factor-like 1) (H36)
SPRL1_HUMAN	SPARC-like protein 1 (High endothelial venule protein) (Hevin) (MAST 9)
KV310_HUMAN	Ig kappa chain V-III region VH (Fragment)
IPSP_HUMAN	Plasma serine protease inhibitor (Acrosomal serine protease inhibitor) (Plasminogen activator inhibitor 3) (PAI-3) (PAI3) (Protein C inhibitor) (PCI) (Serpin A5)
PRIC4_HUMAN	Prickle-like protein 4 (Overexpressed breast tumor protein)
H2A1A_HUMAN	Histone H2A type 1-A (Histone H2A/r)
CBPC3_HUMAN	Cytosolic carboxypeptidase 3 (EC 3.4.17.-) (ATP/GTP-binding protein-like 3)
BRPF3_HUMAN	Bromodomain and PHD finger-containing protein 3
ZN778_HUMAN	Zinc finger protein 778
KV303_HUMAN	Ig kappa chain V-III region NG9 (Fragment)
ANGL2_HUMAN	Angiopoietin-related protein 2 (Angiopoietin-like protein 2)
CERU_HUMAN	Ceruloplasmin (EC 1.16.3.1) (Ferroxidase)
HEXB_HUMAN	Beta-hexosaminidase subunit beta (EC 3.2.1.52) (Beta-N-acetylhexosaminidase subunit beta) (Hexosaminidase subunit B) (Cervical cancer proto-oncogene 7 protein) (HCC-7) (N-acetyl-beta-glucosaminidase subunit beta) [Cleaved into: Beta-hexosaminidase subunit beta chain B; Beta-hexosaminidase subunit beta chain A]
TWSG1_HUMAN	Twisted gastrulation protein homolog 1
DSG2_HUMAN	Desmoglein-2 (Cadherin family member 5) (HDGC)
Term
PGRP2_HUMAN	N-acetylmuramoyl-L-alanine amidase (EC 3.5.1.28) (Peptidoglycan recognition protein 2) (Peptidoglycan recognition protein long) (PGRP-L)
EZRI_HUMAN	Ezrin (Cytovillin) (Villin-2) (p81)
ANXA2_HUMAN	Annexin A2 (Annexin II) (Annexin-2) (Calpactin I heavy chain) (Calpactin-1 heavy chain) (Chromobindin-8) (Lipocortin II) (Placental anticoagulant protein IV) (PAP-IV) (Protein I) (p36)
APOM_HUMAN	Apolipoprotein M (Apo-M) (ApoM) (Protein G3a)
RS27A_HUMAN	Ubiquitin-40S ribosomal protein S27a (Ubiquitin carboxyl extension protein 80) [Cleaved into: Ubiquitin; 40S ribosomal protein S27a]
EPHB4_HUMAN	Ephrin type-B receptor 4 (EC 2.7.10.1) (Hepatoma transmembrane kinase) (Tyrosine-protein kinase TYRO11)
CUTA_HUMAN	Protein CutA (Acetylcholinesterase-associated protein) (Brain acetylcholinesterase putative membrane anchor)
CADM4_HUMAN	Cell adhesion molecule 4 (Immunoglobulin superfamily member 4C) (IgSF4C) (Nectin-like protein 4) (NECL-4) (TSLC1-like protein 2)
ABHEB_HUMAN	Alpha/beta hydrolase domain-containing protein 14B (Abhydrolase domain-containing protein 14B) (EC 3.-.-.-) (CCG1-interacting factor B)
EGF_HUMAN	Pro-epidermal growth factor (EGF) [Cleaved into: Epidermal growth factor (Urogastrone)]
TPP1_HUMAN	Tripeptidyl-peptidase 1 (TPP-1) (EC 3.4.14.9) (Cell growth-inhibiting gene 1 protein) (Lysosomal pepstatin-insensitive protease) (LPIC) (Tripeptidyl aminopeptidase) (Tripeptidyl-peptidase I) (TPP-I)
RT02_HUMAN	28S ribosomal protein S2, mitochondrial (MRP-S2) (S2mt)
LAC2_HUMAN	Ig lambda-2 chain C regions
CO4A_HUMAN	Complement C4-A (Acidic complement C4) (C3 and PZP-like alpha-2-macroglobulin domain-containing protein 2) [Cleaved into: Complement C4 beta chain; Complement C4-A alpha chain; C4a anaphylatoxin; C4b-A; C4d-A; Complement C4 gamma chain]
RNAS2_HUMAN	Non-secretory ribonuclease (EC 3.1.27.5) (Eosinophil-derived neurotoxin) (RNase UpI-2) (Ribonuclease 2) (RNase 2) (Ribonuclease US)
IF6_HUMAN	Eukaryotic translation initiation factor 6 (eIF-6) (B(2)GCN homolog) (B4 integrin interactor) (CAB) (p27(BBP))
PVRL2_HUMAN	Nectin-2 (Herpes virus entry mediator B) (Herpesvirus entry mediator B) (HveB) (Poliovirus receptor-related protein 2) (CD antigen CD112)
CO2A1_HUMAN	Collagen alpha-1(II) chain (Alpha-1 type II collagen) [Cleaved into: Collagen alpha-1(II) chain; Chondrocalcin]
THBG_HUMAN	Thyroxine-binding globulin (Serpin A7) (T4-binding globulin)
ANTR1_HUMAN	Anthrax toxin receptor 1 (Tumor endothelial marker 8)
P3IP1_HUMAN	Phosphoinositide-3-kinase-interacting protein 1 (Kringle domain-containing protein HGFL)
ANAG_HUMAN	Alpha-N-acetylglucosaminidase (EC 3.2.1.50) (N-acetyl-alpha-glucosaminidase) (NAG) [Cleaved into: Alpha-N-acetylglucosaminidase 82 kDa form; Alpha-N-acetylglucosaminidase 77 kDa form]
BGAL_HUMAN	Beta-galactosidase (EC 3.2.1.23) (Acid beta-galactosidase) (Lactase) (Elastin receptor 1)
BT2A1_HUMAN	Butyrophilin subfamily 2 member A1
SRC8_HUMAN	Src substrate cortactin (Amplaxin) (Oncogene EMS1)
IGSF8_HUMAN	Immunoglobulin superfamily member 8 (IgSF8) (CD81 partner 3) (Glu-Trp-Ile EWI motif-containing protein 2) (EWI-2) (Keratinocytes-associated transmembrane protein 4) (KCT-4) (LIR-D1) (Prostaglandin regulatory-like protein) (PGRL) (CD antigen CD316)
ACTB_HUMAN	Actin, cytoplasmic 1 (Beta-actin) [Cleaved into: Actin, cytoplasmic 1, N-terminally processed]
ADX_HUMAN	Adrenodoxin, mitochondrial (Adrenal ferredoxin) (Ferredoxin-1) (Hepatoredoxin)
PRDX2_HUMAN	Peroxiredoxin-2 (EC 1.11.1.15) (Natural killer cell-enhancing factor B) (NKEF-B) (PRP) (Thiol-specific antioxidant protein) (TSA) (Thioredoxin peroxidase 1) (Thioredoxin-dependent peroxide reductase 1)
ALDOA_HUMAN	Fructose-bisphosphate aldolase A (EC 4.1.2.13) (Lung cancer antigen NY-LU-1) (Muscle-type aldolase)
OSTP_HUMAN	Osteopontin (Bone sialoprotein 1) (Nephropontin) (Secreted phosphoprotein 1) (SPP-1) (Urinary stone protein) (Uropontin)
CYC_HUMAN	Cytochrome c
HSP7C_HUMAN	Heat shock cognate 71 kDa protein (Heat shock 70 kDa protein 8) (Lipopolysaccharide-associated protein 1) (LAP-1) (LPS-associated protein 1)
A2MG_HUMAN	Alpha-2-macroglobulin (Alpha-2-M) (C3 and PZP-like alpha-2-macroglobulin domain-containing protein 5)
C1RL_HUMAN	Complement C1r subcomponent-like protein (C1r-LP) (C1r-like protein) (EC 3.4.21.-) (C1r-like serine protease analog protein) (CLSPa)
TPIS_HUMAN	Triosephosphate isomerase (TIM) (EC 5.3.1.1) (Triose-phosphate isomerase)
FIBB_HUMAN	Fibrinogen beta chain [Cleaved into: Fibrinopeptide B; Fibrinogen beta chain]
FBLN2_HUMAN	Fibulin-2 (FIBL-2)
ACTN4_HUMAN	Alpha-actinin-4 (F-actin cross-linking protein) (Non-muscle alpha-actinin 4)
ANXA4_HUMAN	Annexin A4 (35-beta calcimedin) (Annexin IV) (Annexin-4) (Carbohydrate-binding protein p33/p41) (Chromobindin-4) (Endonexin I) (Lipocortin IV) (P32.5) (PP4-X) (Placental anticoagulant protein II) (PAP-II) (Protein II)
CMGA_HUMAN	Chromogranin-A (CgA) (Pituitary secretory protein I) (SP-I) [Cleaved into: Vasostatin-1 (Vasostatin I); Vasostatin-2 (Vasostatin II); EA-92; ES-43; Pancreastatin; SS-18; WA-8; WE-14; LF-19; AL-11; GV-19; GR-44; ER-37]
CNTN2_HUMAN	Contactin-2 (Axonal glycoprotein TAG-1) (Axonin-1) (Transient axonal glycoprotein 1) (TAX-1)
6PGL_HUMAN	6-phosphogluconolactonase (6PGL) (EC 3.1.1.31)
PNKP_HUMAN	Bifunctional polynucleotide phosphatase/kinase (DNA 5'-kinase/3'-phosphatase) (Polynucleotide kinase-3'-phosphatase) [Includes: Polynucleotide 3'-phosphatase (EC 3.1.3.32) (2'(3')-polynucleotidase); Polynucleotide 5'-hydroxyl-kinase (EC 2.7.1.78)]
NCAM1_HUMAN	Neural cell adhesion molecule 1 (N-CAM-1) (NCAM-1) (CD antigen CD56)
DPP2_HUMAN	Dipeptidyl peptidase 2 (EC 3.4.14.2) (Dipeptidyl aminopeptidase II) (Dipeptidyl peptidase 7) (Dipeptidyl peptidase II) (DPP II) (Quiescent cell proline dipeptidase)
PGCA_HUMAN	Aggrecan core protein (Cartilage-specific proteoglycan core protein) (CSPCP) (Chondroitin sulfate proteoglycan core protein 1) (Chondroitin sulfate proteoglycan 1) [Cleaved into: Aggrecan core protein 2]
THRB_HUMAN	Prothrombin (EC 3.4.21.5) (Coagulation factor II) [Cleaved into: Activation peptide fragment 1; Activation peptide fragment 2; Thrombin light chain; Thrombin heavy chain]
MIF_HUMAN	Macrophage migration inhibitory factor (MIF) (EC 5.3.2.1) (Glycosylation-inhibiting factor) (GIF) (L-dopachrome isomerase) (L-dopachrome tautomerase) (EC 5.3.3.12) (Phenylpyruvate tautomerase)
NAGAB_HUMAN	Alpha-N-acetylgalactosaminidase (EC 3.2.1.49) (Alpha-galactosidase B)
KV312_HUMAN	Ig kappa chain V-III region HAH
TENA_HUMAN	Tenascin (TN) (Cytotactin) (GMEM) (GP 150-225) (Glioma-associated-extracellular matrix antigen) (Hexabrachion) (JI) (Myotendinous antigen) (Neuronectin) (Tenascin-C) (TN-C)
GOLM1_HUMAN	Golgi membrane protein 1 (Golgi membrane protein GP73) (Golgi phosphoprotein 2)
PPAL_HUMAN	Lysosomal acid phosphatase (LAP) (EC 3.1.3.2)
BTD_HUMAN	Biotinidase (Biotinase) (EC 3.5.1.12)
AMYP_HUMAN	Pancreatic alpha-amylase (PA) (EC 3.2.1.1) (1,4-alpha-D-glucan glucanohydrolase)
HV304_HUMAN	Ig heavy chain V-III region TIL
CSPG4_HUMAN	Chondroitin sulfate proteoglycan 4 (Chondroitin sulfate proteoglycan NG2) (Melanoma chondroitin sulfate proteoglycan) (Melanoma-associated chondroitin sulfate proteoglycan)
