# Supplementary material
Source: Elsevier journal article supplement (https://www.sciencedirect.com/science/article/pii/S2444866417300508)
Supplement: mmc5 [file S2444866417300508:mmc5.docx]

Supplemental Table S1: List of all identified proteins by GeLC-MS/MS and unique proteins *per* group.

Supplemental Figure S1: SDS-PAGE 12.5% gel corresponding to the separation of 20 μg of urinary proteins. MWM – Molecular weight marker.

Supplemental Figure S2: ClueGo and CluePedia analysis of protein-protein interaction considering unique proteins identified in the urine of term and preterm neonates. Blue nodes refer to biological processes prevalent in preterm neonates and pink nodes represent the ones widespread in term neonates.

Supplemental Figure S3: ClueGo and CluePedia analysis of protein-protein interaction considering common proteins present in significant distinct levels (based on emPAI values) in the urine of neonates from Term and PreTerm groups. Green nodes refer to biological processes positively regulated, whereas red nodes refer to the ones negatively regulated in preterm nenonates.
